# Supplementary material for: Infected deep vein thrombophlebitis in people who inject drugs: missed opportunities and potential for alternative antimicrobial approaches
Source: PubMed Central journal article supplement (PMC8942891; doi:10.1007/s15010-021-01725-3), 2021-11-02
Supplement: 15010_2021_1725_MOESM1_ESM.pdf [file 15010_2021_1725_MOESM1_ESM.pdf]

**Infected deep vein thrombophlebitis in people who inject drugs: missed opportunities and potential for alternative antimicrobial approaches.**

Hugh McCaughan, Clark D. Russell, Dáire T. O'Shea

**SUPPLEMENTARY DATA**

**Contents**

|                                                                                               |    |
|-----------------------------------------------------------------------------------------------|----|
| Supplementary Figure 1: Combinations of substances used .....                                 | 2  |
| Supplementary Figure 2: Symptom clusters .....                                                | 3  |
| Supplementary Figure 3: Laboratory parameters on admission.....                               | 4  |
| Supplementary Table 1: Additional cohort characteristics.....                                 | 5  |
| Supplementary Table 2: Microbiological findings.....                                          | 7  |
| Supplementary Table 3: Classification of antimicrobial spectra .....                          | 7  |
| Supplementary Table 4: Cumulative antimicrobial usage.....                                    | 8  |
| Supplementary Table 5: Univariable analyses of factors associated with clinical failure ..... | 9  |
| Supplementary Table 6: Findings from previous observational studies .....                     | 9  |
| References .....                                                                              | 10 |

**FIGURES**

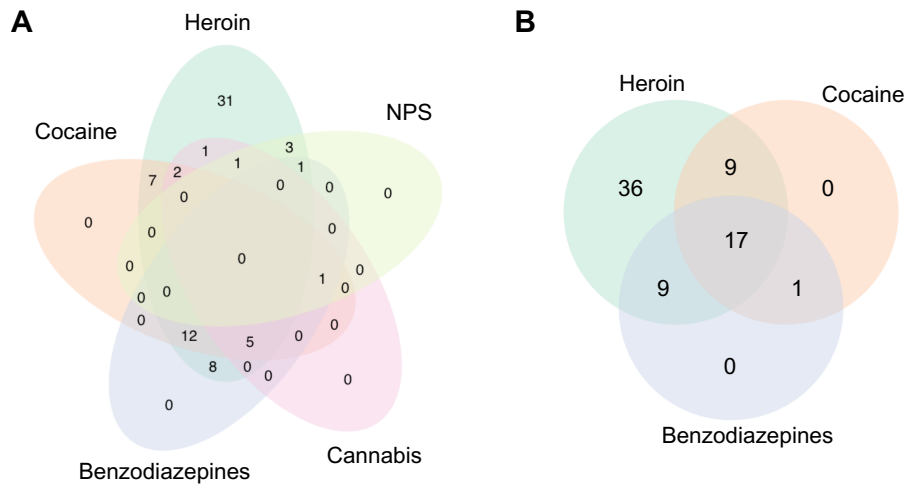

**Supplementary Figure 1: Combinations of substances used**

**(A)** Overlap in use of all specified substances. **(B)** Overlap in use of most commonly used substances. NPS: new psychoactive substances.

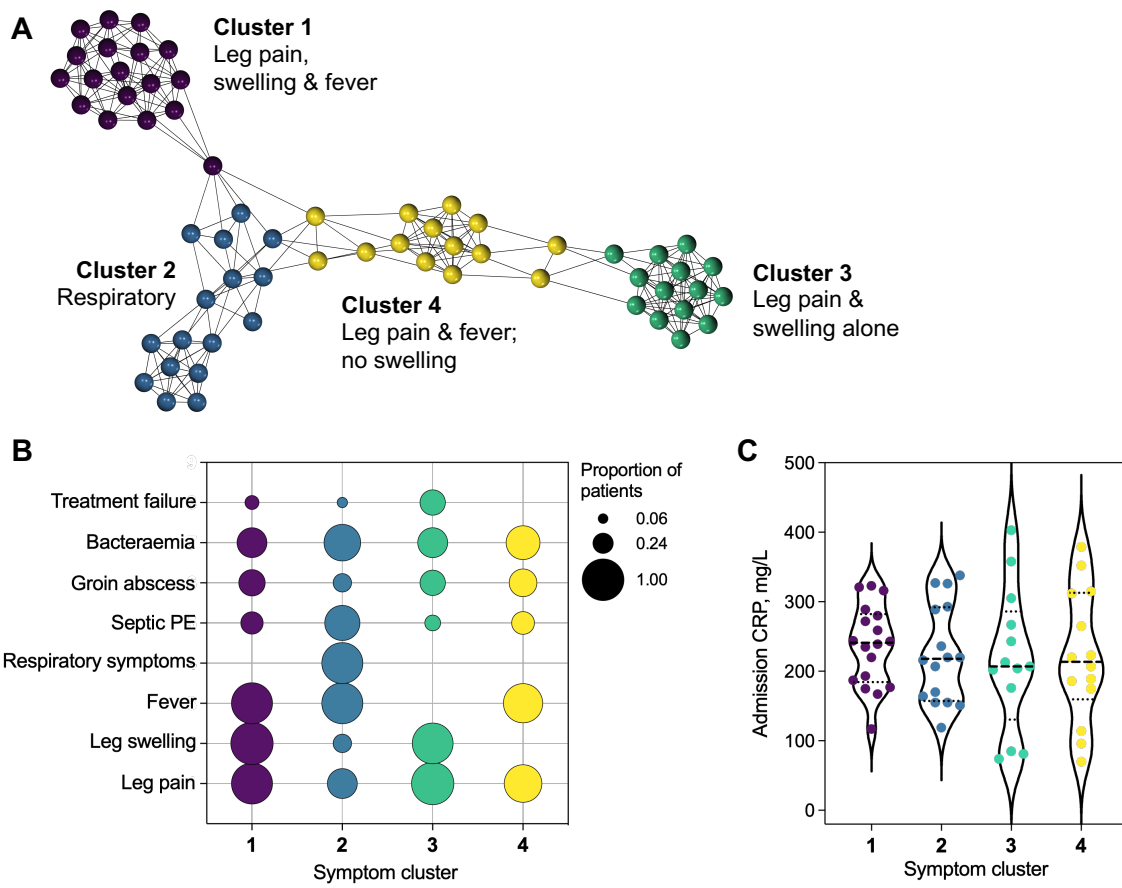

### Supplementary Figure 2: Symptom clusters

**(A)** Patient-to-patient network analysis. Symptoms documented on admission (leg pain, leg swelling, fever and respiratory [ $\geq 1$  of cough, dyspnoea or pleuritic chest pain]) were used to identify four clusters of patients. Edges represent connections with a Pearson correlation value of  $\geq 0.5$  (chosen to keep all patients in the network). k-Nearest-Neighbours method was used for edge reduction ( $k=5$ ). Nodes represent patients and are coloured by cluster membership, determined using the Markov Clustering Algorithm (a coarse granularity of 1.5 was applied to avoid excessive division of patients into small uninterpretable clusters). Patients with any missing symptom data were excluded leaving  $n=62$ . **(B)** Bubble plot representing proportion of patients in each symptom cluster with the listed feature. Size of bubble indicates proportion of patients. Bacteraemia is presented as a proportion of patients who had blood cultures taken. **(C)** C-reactive protein (CRP) concentration at admission did not differ between the symptom clusters. Dashed line within violin plot shows median and thin dotted lines show first and third quartiles.

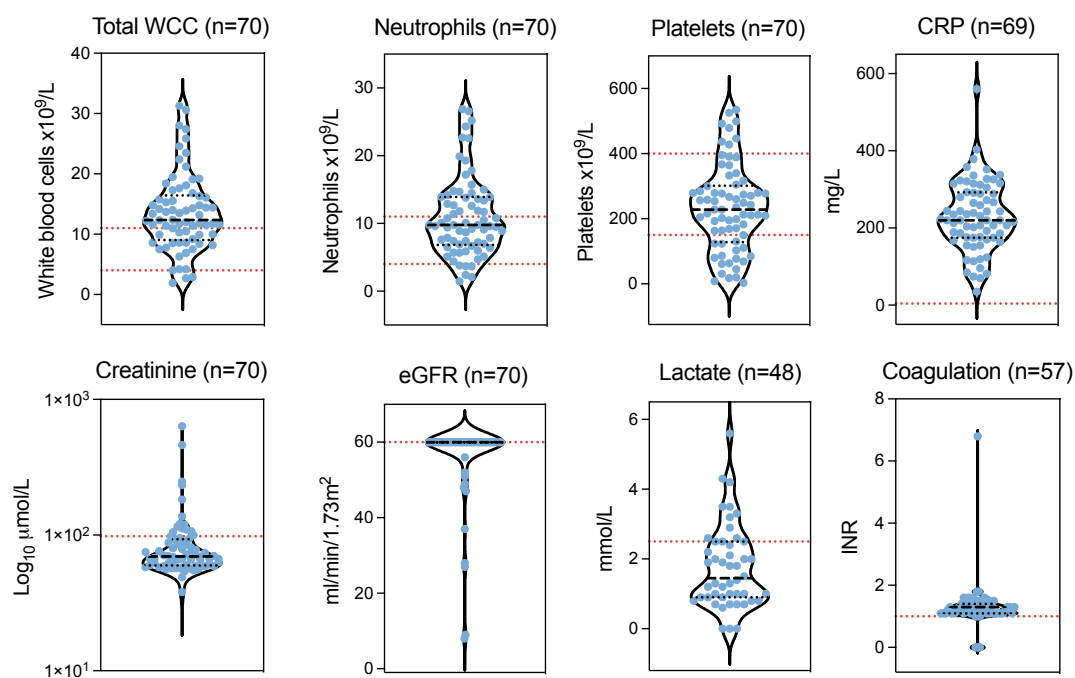

**Supplementary Figure 3: Laboratory parameters on admission**

Total white cell count, neutrophil count, platelet count, C-reactive protein, creatinine, estimated glomerular filtration rate, lactate and coagulation measured by internationalised normal ratio (INR). Dashed line within violin plot shows median and dotted lines show first and third quartiles. Red dotted lines on y-axis represent upper and lower limits of normality (if two lines) or upper limit of normality (if single line).

## TABLES

**Supplementary Table 1: Additional cohort characteristics**

| <b>Variable</b>              | <b>N (%)<br/>(n=70)<sup>a</sup></b> |
|------------------------------|-------------------------------------|
| <b>Demographics</b>          |                                     |
| Housing                      |                                     |
| Permanent                    | 49 (70)                             |
| Temporary                    | 10 (14.3)                           |
| No fixed abode               | 10 (14.3)                           |
| <b>Substance use</b>         |                                     |
| Alcohol                      |                                     |
| None                         | 14 (20)                             |
| Recommended limits           | 37 (52.9)                           |
| Harmful use                  | 1 (1.4)                             |
| Dependence                   | 9 (12.9)                            |
| <b>Blood borne viruses</b>   |                                     |
| Human immunodeficiency virus |                                     |
| Positive                     | 0                                   |
| Negative                     | 60 (85.7)                           |
| Not tested                   | 10 (14.3)                           |
| Hepatitis B virus            |                                     |
| Positive (active)            | 2 (2.9)                             |
| Negative                     | 59 (84.3)                           |
| Not tested                   | 9 (12.9)                            |
| Hepatitis C virus            |                                     |
| Active infection             | 22 (31.4)                           |
| Cleared infection            | 15 (21.4)                           |
| Negative                     | 26 (37.1)                           |
| Not tested                   | 4 (5.7)                             |
| HCV treatment history        |                                     |
| Never treated                | 14 (20)                             |
| Treated: now negative        | 3 (4.3)                             |
| Treated: failed therapy      | 1 (1.4)                             |
| Spontaneous clearance        | 15 (21.4)                           |
| <b>Presentation</b>          |                                     |
| Presenting symptoms          |                                     |
| Pain                         | 49 (70)                             |
| Leg swelling                 | 34 (48.6)                           |
| Fever                        | 47 (67.1)                           |
| Fever alone                  | 7 (10)                              |
| Respiratory symptoms         | 19 (27.1)                           |
| Physical examination         |                                     |
| Groin sinus                  | 63/68 (92.6)                        |
| Local infection              | 42/68 (61.8)                        |
| <b>Location of thrombus</b>  |                                     |
| Common femoral vein          | 29 (41.4)                           |
| External iliac vein          | 17 (24.3)                           |
| Common iliac vein            | 14 (20)                             |
| Distal femoral vein          | 7 (10)                              |
| Internal iliac vein          | 1 (1.4)                             |
| Other vein                   | 2 (2.9)                             |
| <b>Illness severity</b>      |                                     |
| qSOFA score $\geq 2$         | 7 (10)                              |

|                                 |           |
|---------------------------------|-----------|
| SIRS criteria $\geq 2$          | 46 (65.7) |
| ICU admission                   | 13 (18.6) |
| Vasopressors                    | 12 (17.1) |
| Invasive mechanical ventilation | 5 (7.1)   |
| Renal replacement therapy       | 1 (1.4)   |

Data shown as n(%) unless otherwise stated.

<sup>a</sup>Denominator = 70 unless otherwise stated

IQR: interquartile range; HIV: human immunodeficiency virus; HBV: hepatitis B virus; HCV: hepatitis C virus; BP: blood pressure; SpO<sub>2</sub>: oxygen saturations; qSOFA: quick sequential organ failure assessment; SIRS: systemic inflammatory response syndrome; ICU: intensive care unit.

## Supplementary Table 2: Microbiological findings

| Bacteria                          | Total          | Blood          | Intra-operative |
|-----------------------------------|----------------|----------------|-----------------|
| Staphylococci                     |                |                |                 |
| <i>Staphylococcus aureus</i>      | 33             | 24             | 9               |
| Coagulase-negative                | 5              | 2 <sup>a</sup> | 3               |
| Streptococci                      |                |                |                 |
| Anginosus group                   | 10             | 4              | 6               |
| Viridans group <sup>b</sup>       | 5              | 5              | 0               |
| <i>Streptococcus pyogenes</i>     | 5              | 4              | 1               |
| <i>Streptococcus dysgalactiae</i> | 3              | 2              | 1               |
| Anaerobes                         |                |                |                 |
| Actinomyces sp.                   | 4              | 4              | 0               |
| Fusobacterium sp.                 | 2 <sup>c</sup> | 1              | 1               |
| Other/Not specified               | 5              | 3              | 2               |
| Gram negative                     |                |                |                 |
| <i>Escherichia coli</i>           | 3 <sup>c</sup> | 1              | 2               |
| Other gram positive               |                |                |                 |
| <i>Enterococcus faecalis</i>      | 1 <sup>c</sup> | 1              | 0               |
| <i>Helcococcus kunzii</i>         | 1 <sup>c</sup> | 1              | 0               |
| <i>Lactobacillus fermentum</i>    | 1 <sup>c</sup> | 0              | 1               |
| <i>Trueperella bernardiae</i>     | 1 <sup>c</sup> | 1              | 0               |

<sup>a</sup> both patients with coagulase-negative Staphylococci isolated from blood culture also had other pathogens identified in blood cultures (n=1 *Streptococcus anginosus*; n=1 *Actinomyces turicensis* plus *Fusobacterium gonidiaformans*).

<sup>b</sup> excluding Anginosus group Streptococci

<sup>c</sup> identified exclusively from polymicrobial infections

## Supplementary Table 3: Classification of antimicrobial spectra

| Spectrum                                     | Included antimicrobials                                                                                               |
|----------------------------------------------|-----------------------------------------------------------------------------------------------------------------------|
| Gram positive including <i>S. aureus</i>     | Flucloxacillin, vancomycin, clindamycin, piperacillin-tazobactam, ceftriaxone, amoxicillin-clavulanic acid, meropenem |
| Gram positive not including <i>S. aureus</i> | Penicillin, amoxicillin                                                                                               |
| Gram negative                                | Gentamicin, ciprofloxacin, piperacillin-tazobactam, ceftriaxone, amoxicillin-clavulanic acid, meropenem               |
| Anaerobic                                    | Metronidazole                                                                                                         |

**Supplementary Table 4: Cumulative antimicrobial usage**

| <b>Group</b>                      | <b>Included antimicrobials</b>                                               | <b>N days</b> | <b>% total days</b> |
|-----------------------------------|------------------------------------------------------------------------------|---------------|---------------------|
| Anti-staphylococcal gram positive | Flucloxacillin, vancomycin, daptomycin, linezolid, clindamycin, doxycycline  | 1827          | <b>42.2</b>         |
| Anaerobic                         | Metronidazole                                                                | 1078          | <b>24.9</b>         |
| Broad-spectrum                    | Piperacillin-tazobactam, amoxicillin-clavulanic acid, ceftriaxone, meropenem | 561           | <b>13.0</b>         |
| Narrow-spectrum gram positive     | Penicillin, amoxicillin                                                      | 430           | <b>9.9</b>          |
| Gram negative                     | Gentamicin, ciprofloxacin                                                    | 380           | <b>8.8</b>          |
| Other                             | Clarithromycin, rifampicin                                                   | 27            | <b>0.6</b>          |
| Unknown                           |                                                                              | 19            | <b>0.4</b>          |
| Anidulafungin                     |                                                                              | 3             | <b>0.1</b>          |



**Supplementary Table 5: Univariable analyses of factors associated with clinical failure**

| Variable                                   | Measure | Cure  | Failure | p-value <sup>c</sup> |
|--------------------------------------------|---------|-------|---------|----------------------|
| Bacteraemia                                | N       | 37/58 | 2/8     | 0.055                |
| <i>S. aureus</i>                           | N       | 26/62 | 3/8     | 1.0                  |
| Septic shock <sup>a</sup>                  | N       | 12/62 | 0/8     | 0.3                  |
| qSOFA $\geq 2$ <sup>b</sup>                | N       | 6/55  | 1/7     | 1.0                  |
| SIRS $\geq 2$ <sup>b</sup>                 | N       | 43/59 | 3/8     | 0.1                  |
| Total WCC ( $\times 10^9/L$ ) <sup>b</sup> | Median  | 12.8  | 11.5    | 0.6                  |
| NLR <sup>b</sup>                           | Median  | 8.1   | 8.6     | 0.6                  |
| CRP (mg/L) <sup>b</sup>                    | Mean    | 229.4 | 238.4   | 0.8                  |
| Peak CRP (mg/L)                            | Mean    | 256.5 | 248.5   | 0.8                  |
| Metastatic infection                       | N       | 26/62 | 3/8     | 1.0                  |
| Local abscess                              | N       | 22/62 | 2/8     | 0.7                  |
| Initial gram-negative coverage             | N       | 44/61 | 4/8     | 0.2                  |

<sup>a</sup> requirement for vasopressors

<sup>b</sup> measured at admission

<sup>c</sup> un-adjusted p-value

WCC: white cell count; NLR: neutrophil:lymphocyte ratio; CRP: C-reactive protein

**Supplementary Table 6: Findings from previous observational studies**

|                                                  | Hakeem & Bhattacharyya [1] | Fäh <i>et al</i> [2]                                     | Mertz <i>et al</i> [3]                                                      |
|--------------------------------------------------|----------------------------|----------------------------------------------------------|-----------------------------------------------------------------------------|
| Location                                         | U.K.                       | Switzerland                                              | Switzerland                                                                 |
| Design                                           | Retrospective cohort       | Retrospective cohort                                     | Retrospective cohort                                                        |
| Denominator                                      | 10 (patients)              | 7 (patients)                                             | 36 (episodes)                                                               |
| Age, years                                       | 34 (mean)                  | 30 (median)                                              | 33 (median)                                                                 |
| Male:Female                                      | 8:2                        | 3:4                                                      | 22:14                                                                       |
| DVT location                                     | Ileofemoral (10)           | Ileofemoral (5)<br>Internal jugular (1)<br>Upper arm (1) | Ileofemoral (28)<br>Internal jugular (5)<br>Saphenous (2)<br>Subclavian (1) |
| Complications                                    |                            |                                                          |                                                                             |
| Septic PE                                        | 5                          | 2                                                        | 5                                                                           |
| IE                                               | 1                          | 0                                                        | 3                                                                           |
| Microbiology <sup>a</sup>                        |                            |                                                          |                                                                             |
| <i>S. aureus</i>                                 | 5                          | 4                                                        | 19                                                                          |
| Streptococci                                     | 4                          | 2                                                        | 14                                                                          |
| Gram negative                                    | 0                          | 0                                                        | 0                                                                           |
| HCV                                              | 4                          | 3                                                        | 4                                                                           |
| Total antimicrobial duration (d), median (range) | 29.5 (15-64)               | 28 (10-41)                                               | 19.5 (6-85)                                                                 |
| Clinical cure <sup>b</sup>                       | 8/10                       | 5/7                                                      | 34/36                                                                       |

<sup>a</sup>Blood cultures only

<sup>b</sup>Defined as relapse of same infection within one year

## References

1. Hakeem MBD. Septic deep venous thrombophlebitis and distant emboli in injecting drug users – treatment experience and outcome. *J R Coll Physicians Edinb* **2007**; 37(4): 293-9.
2. Fäh F, Zimmerli W, Jordi M, Schoenenberger RA. Septic deep venous thrombosis in intravenous drug users. *Swiss Med Wkly* **2002**; 132(27-28): 386-92.
3. Mertz D, Khanlari B, Viktorin N, Battegay M, Fluckiger U. Less than 28 days of intravenous antibiotic treatment is sufficient for suppurative thrombophlebitis in injection drug users. *Clin Infect Dis* **2008**; 46(5): 741-4.
